# Supplementary material
Source: PubMed Central journal article supplement (PMC3285331)
Supplement: supp_M111.305359_jbc.M111.305359-1.pdf [file supp_M111.305359_jbc.M111.305359-1.pdf]

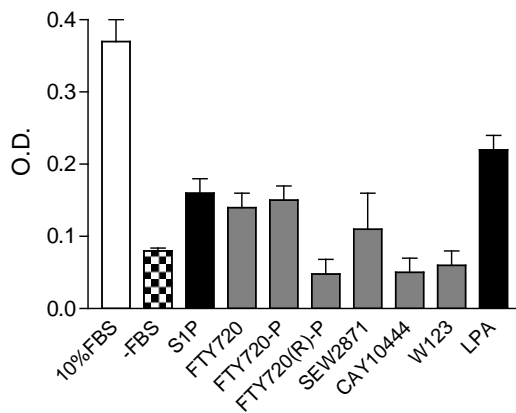

**Supplementary Fig. 1. Lysophospholipid-induced cell proliferation.** INS-1 cells were cultured in the RPMI 1640 medium. The same numbers of INS-1 cells were plated in the 96-well plate in the medium of RPMI for overnight, washed with PBS, and continuously cultured in the Hanks' balanced salt solution (HBSS) containing 2 mM glucose and 0.5% FBS for overnight. Then the cells were treated with LP analogs in the fresh HBSS medium for 24 hours. Then the treated cells were subjected to analysis by a Cell Proliferation Assay Kit (XTT) according to the manufacturer's instruction (Roche). The absorbance (A<sub>492 nm</sub>–A<sub>690 nm</sub>) was measured by a microplate reader. S1P, FTY720, and FTY720-P: 0.1  $\mu$ M; FTY720(R)-P: 0.01  $\mu$ M; Cay, 10  $\mu$ M; W123: 20  $\mu$ M; SEW2871: 0.1  $\mu$ M; LPA, 10  $\mu$ M.

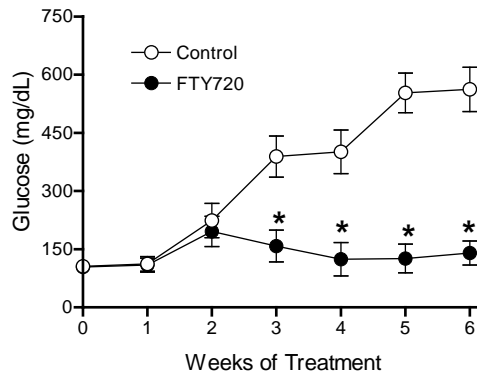

**Supplementary Fig. 2. Fasting glucose levels.** Five-week-old female db/db mice (BKS.Cg-*m*<sup>+/+</sup>*Lepr*<sup>db</sup>) were purchased from Jackson Laboratories (Bar Harbor, Me., USA). After a week housing, FTY720 (10 mg/kg) was intraperitoneally injected into db/db mice daily (6 weeks old). The fasting glucose levels were measured at the end of each week. \**p* < 0.001. Some mice developed ankyloenteron in the injection area. Therefore, after 6 weeks treatments, all mice with injection of FTY720 were sacrificed.

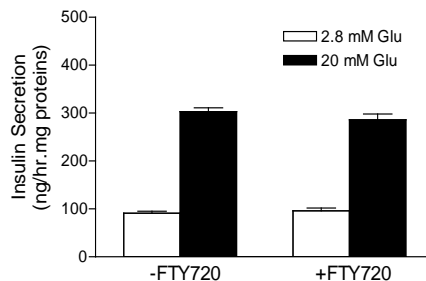

**Supplementary Fig. 3.** FTY720 does not affect glucose-stimulated insulin secretion by normal islets *ex vivo*. Islets were isolated from 8 weeks old normal C57/BL6 mice and treated with or without 0.2  $\mu$ M FTY720 in the culture medium without FBA for 24 hours. Then the islets were stimulated with glucose and secreted insulin was measured using a Ultra Sensitive Mouse Insulin ELISA Kit (Crystal Chem Inc., Downers Grove, IL) and total proteins of islets were measured.
